# Supplementary material for: OmpA Protein-Deficient Acinetobacter baumannii Outer Membrane Vesicles Trigger Reduced Inflammatory Response
Source: PubMed Central journal article supplement (PMC8066360; doi:10.3390/pathogens10040407), 2021-03-31
Supplement: pathogens-10-00407-s001.pdf [file pathogens-10-00407-s001.pdf]

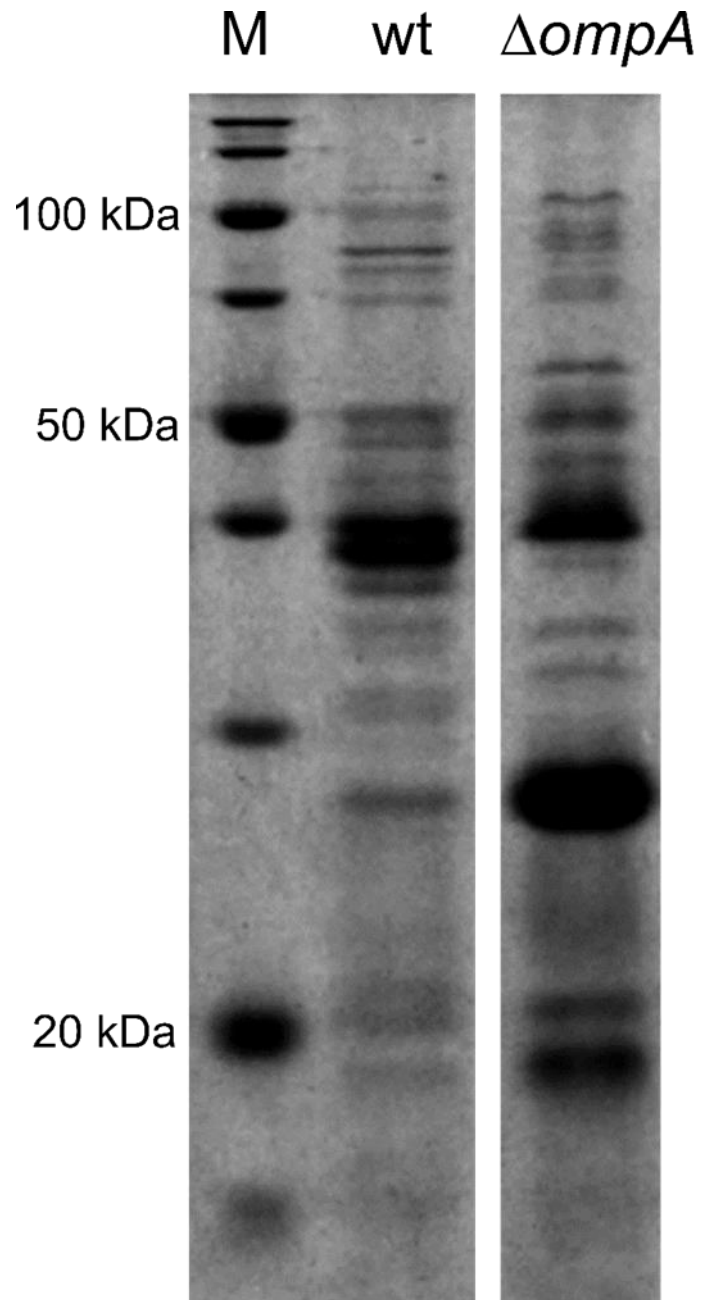

**Figure S1.** Proteins of outer membrane vesicles (OMVs) from *A. baumannii* wt strain and its  $\Delta ompA$  mutant. Proteins were fractionated by SDS-PAGE and stained with Coomassie Brilliant Blue. M—PageRuler Unstained Broad Range Protein Ladder (Thermo Fisher Scientific).
